# Supplementary material for: Selective measurement of Cl2 and HCl based on dopant-assisted negative photoionization ion mobility spectrometry combined with semiconductor cooling
Source: Royal Society of Chemistry journal article supplement (doi:10.1039/d4ay00690a), 2024-01-01
Supplement: d4ay00690a1.pdf [file d4ay00690a1.pdf]

## Supporting Information

### Selective measurement of Cl<sub>2</sub> and HCl based on Dopant-assisted negative photoionization Ion mobility spectrometer Combined with the Semiconductor Cooling

Siyu Song<sup>a,b,d,e</sup>, Shaoxu Wang<sup>a</sup>, Wei Huang<sup>b,c,d,e,\*</sup>, Hang Li<sup>b,d,e</sup>, Weiguo Wang<sup>b,c,d,e</sup>, Jinghua Li<sup>b,c,d,e</sup>, Chuang Chen<sup>b,c,d,e</sup>, Xueying Bai<sup>b,d,e</sup>, Junyu Yang<sup>b,d,e</sup>, Yi Chen<sup>b,c,d,e</sup>, Zhihao Zhang<sup>b,c,d,e</sup>,  
Huaiwen Cang<sup>b,d,e</sup>, Haiyang Li<sup>b,c,d,e\*</sup>

*a. Dalian Jiaotong University, School of Environmental and Chemical Engineering, Dalian, 116028, People's Republic of China*

*b. Dalian Institute of Chemical Physics, Chinese Academy of Sciences, Dalian, 116023, People's Republic of China*

*c. University of Chinese Academy of Sciences, Beijing, 100049, People's Republic of China*

*d. Dalian Key Laboratory for Online Analytical Instrumentation, Dalian, 116023, People's Republic of China*

*e. Liaoning Key Laboratory for Mass Spectrometry Technology and Instrumentation, Dalian, 116023, People's Republic of China*

*\* Corresponding authors. Wei Huang, email: weihuang@dicp.ac.cn; Haiyang Li, email: hli@dicp.ac.cn.*

#### Abstract

This supporting information provides additional information on the following aspects:

Schematic diagram of the online dilution system for obtaining different concentrations of Cl<sub>2</sub> or HCl (Fig.S1); Schematic diagram of the online dilution and humidification system for obtaining different concentrations of Cl<sub>2</sub> or HCl (Fig.S2); The work sequence of the DANP-IMS coupled semiconductor cooling pre-processing method (Fig.S3); The comparison of Cl<sub>2</sub> signal intensity passing through the cold trap and not passing through the cold trap at different concentrations (Fig.S4).

#### S1. Schematic diagram of the online dilution system for obtaining different concentrations of Cl<sub>2</sub> or HCl.

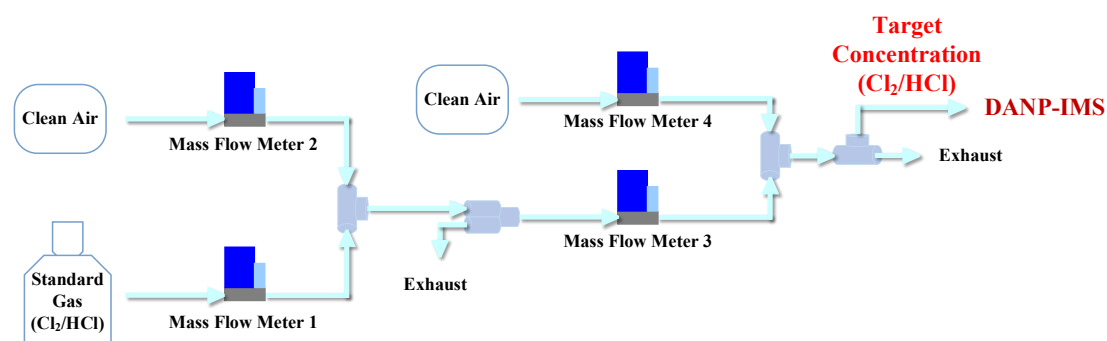

Fig S1. Schematic diagram of the online dilution system.

As shown in Fig S1, the online dilution system included four mass flow meters for two dilutions. Mass flow meter 1 was used to control the standard  $\text{Cl}_2$  or  $\text{HCl}$  gas flow rate. At the same time, mass flow meter 2 was used to control the flow rate of clean air as the dilution gas. By adjusting the two flow meters, a lower-concentration standard  $\text{Cl}_2$  or  $\text{HCl}$  gas was obtained after the first dilution. Then, mass flow meter 3 was used to control the  $\text{Cl}_2$  or  $\text{HCl}$  flow rate obtained after the first dilution and excess gas was discharged. The mass flow meter 4 was used to control the clean air flow rate for the second dilution, and the desired target concentration of  $\text{Cl}_2$  or  $\text{HCl}$  was obtained. Finally, a triple quick connector adapter was used to connect the DANP-IMS for sampling and discharging of excess gas.

## S2. Schematic diagram of the online dilution and humidification system for obtaining different concentrations of $\text{Cl}_2$ or $\text{HCl}$ .

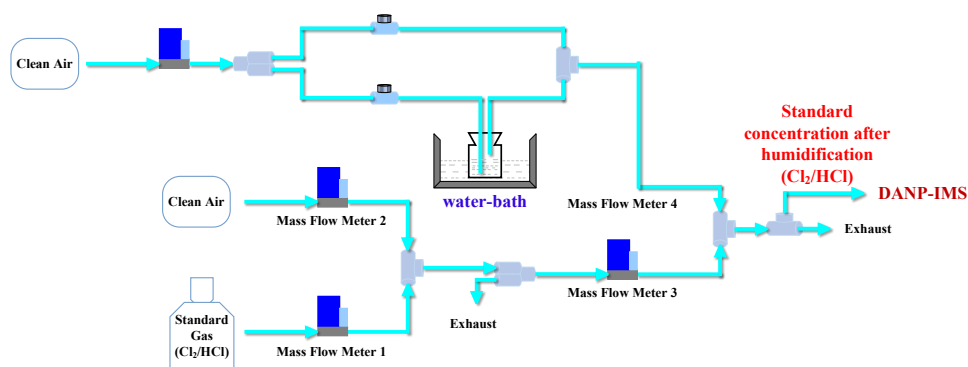

Fig S2. Schematic diagram of the online dilution and humidification system.

On the basis of the secondary online dilution in S1, a bubbling bottle was added after the secondary dilution gas to humidify the sample and obtain samples at different humidities.

## S3. The work sequence of the DANP-IMS coupled semiconductor cooling pre-processing method.

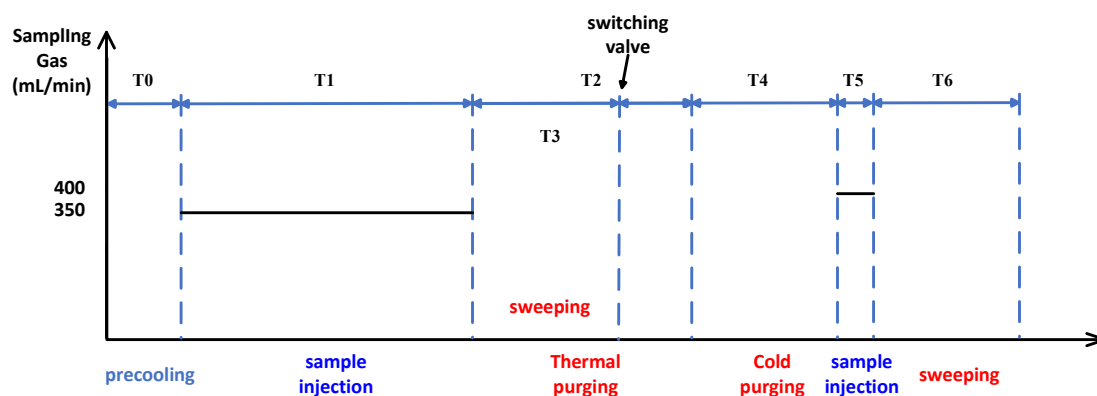

Fig S3. Working sequence of DANP-IMS coupled semiconductor cooling pre-processing method.

The process is divided into two phases: the  $\text{Cl}_2$  (T0-T3) phase and the total chlorine (T4-T6) phase. The  $\text{Cl}_2$  phase includes trap pre-cooling, sample injection at -30 degrees Celsius, purging with drift gas, and trap purging. The pre-cooling phase lasted for one minute, and during the injection phase, the  $\text{Cl}_2$  injection volume was  $350 \text{ ml min}^{-1}$  for four minutes. Purging with drift gas stage was performed simultaneously with the trap purge. During purging with drift gas, the drift gas flow rate is set to  $2000 \text{ mL min}^{-1}$  for 2 minutes. At the same time, the inbuilt pump of the trap purged the aqueous portion of the trap, with the thermal purge lasting for 3 minutes and the room temperature purge lasting for 2 minutes.

The total chlorine phase consists of an injection and a purge. During the injection phase, total chlorine was injected at a volume of  $400 \text{ ml min}^{-1}$  for 30 seconds. During the purge phase, the drift gas flow rate was adjusted to  $2,000 \text{ ml/min}$  for 2 minutes.

**S4. The comparison of  $\text{Cl}_2$  signal intensity passing through the cold trap and not passing through the cold trap at different concentrations.**

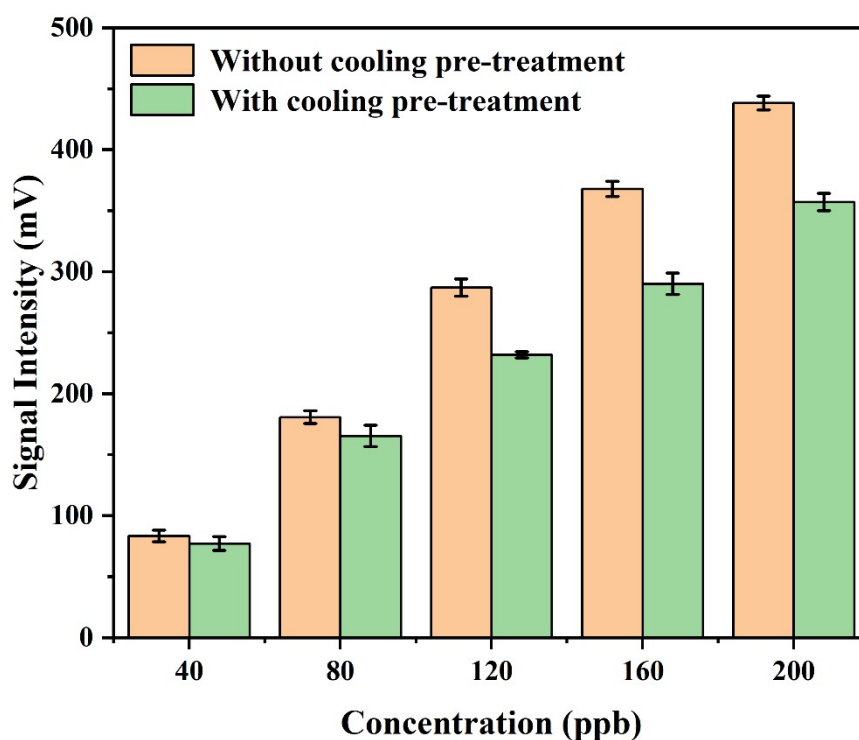

Fig S4. Comparison of signal intensity of  $\text{Cl}_2$  passing through the cold trap and not passing

through the cold trap at different concentrations.

Due to the trap removing a portion of  $\text{Cl}_2$ , the signal intensity of  $\text{Cl}_2$  passing through the trap needs to be compared to the signal intensity of total chlorine without passing through the trap to maintain consistency. By comparing the signal intensities under both conditions at the same concentration, the ratio of the signal intensity for  $\text{Cl}_2$  passing through the trap to that without passing through the trap is found to be 1:1.2.
